# Supplementary figures and images for: A testis-derived macroporous 3D scaffold as a platform for the generation of mouse testicular organoids
Source: Royal Society of Chemistry journal article supplement (doi:10.1039/c8bm01001c), 2019-01-01

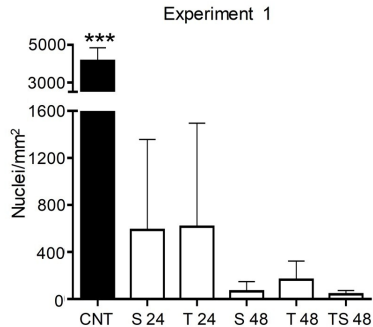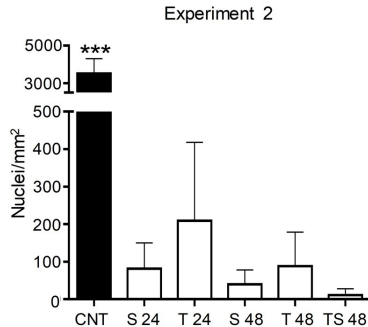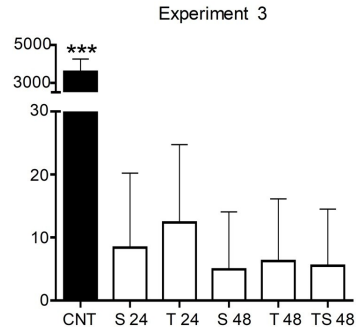

Supplement: c8bm01001c1.pdf [file c8bm01001c1.pdf]
